# Supplementary material
Source: MDPI journal article supplement (https://www.mdpi.com/2624-862X/5/2/24)
Supplement: s1 [file s1]

## Supplementary Materials

**Table S1.** Summary of statistical analyses outcomes, including all dependent variables (DF = degrees of freedom).

| <b>GLMM</b>                                                                         |                                  |           |                            |                 |
|-------------------------------------------------------------------------------------|----------------------------------|-----------|----------------------------|-----------------|
| <b>Dependent variable</b>                                                           | <b>Sources of variation</b>      | <b>DF</b> | <b>F values</b>            | <b>P values</b> |
| Plasma glucose concentration (Glucose, mg/dL)                                       | Treatment                        | 1         | 0.27                       | 0.61            |
|                                                                                     | Calf age                         | 3         | 17.81                      | <0.001          |
|                                                                                     | Interaction treatment x calf age | 3         | 1.65                       | 0.17            |
| Plasma IgG concentration (IgG, mg/mL)                                               | Treatment                        | 1         | 2.07                       | 0.15            |
|                                                                                     | Calf age                         | 3         | 7.29                       | <0.001          |
|                                                                                     | Interaction treatment x calf age | 3         | 2.85                       | 0.03            |
| Heart rate (HR, bpm)                                                                | Treatment                        | 1         | 15.82                      | <0.001          |
|                                                                                     | Calf age                         | 3         | 0.69                       | 0.59            |
|                                                                                     | Interaction treatment x calf age | 3         | 2.78                       | 0.04            |
| Respiratory rate (RR, breaths/min)                                                  | Treatment                        | 1         | 4.09                       | 0.05            |
|                                                                                     | Calf age                         | 3         | 0.66                       | 0.58            |
|                                                                                     | Interaction treatment x calf age | 3         | 0.49                       | 0.69            |
| Rectal temperature (RT, °C)                                                         | Treatment                        | 1         | 5.18                       | 0.03            |
|                                                                                     | Calf age                         | 3         | 4.82                       | 0.003           |
|                                                                                     | Interaction treatment x calf age | 3         | 0.11                       | 0.95            |
| Flight distance (FD, m)                                                             | Treatment                        | 1         | 18.54                      | <0.001          |
|                                                                                     | Calf age                         | 3         | 2.46                       | 0.07            |
|                                                                                     | Interaction treatment x calf age | 3         | 2.57                       | 0.06            |
| Latency for the calf first movement during the docility test (LM, s)                | Treatment                        | 1         | 0.61                       | 0.44            |
|                                                                                     | Calf age                         | 3         | 4.60                       | 0.004           |
|                                                                                     | Interaction treatment x calf age | 3         | 1.90                       | 0.13            |
| Latency to hold the calf in a corner of corral pen during the docility test (LH, s) | Treatment                        | 1         | 8.85                       | 0.005           |
|                                                                                     | Calf age                         | 3         | 9.92                       | <0.001          |
|                                                                                     | Interaction treatment x calf age | 3         | 0.52                       | 0.67            |
| Total time the calf allowed touching during the docility test (TTT, s)              | Treatment                        | 1         | 9.37                       | 0.003           |
|                                                                                     | Calf age                         | 3         | 3.79                       | 0.01            |
|                                                                                     | Interaction treatment x calf age | 3         | 1.30                       | 0.28            |
| Body weight (BW, kg)                                                                | Treatment                        | 1         | 1.41                       | 0.24            |
|                                                                                     | Calf age                         | 3         | 870.36                     | <0.001          |
|                                                                                     | Interaction treatment x calf age | 3         | 0.21                       | 0.89            |
|                                                                                     | Birth weight                     | 1         | 6.80                       | 0.01            |
| Average daily gain (ADG, kg/dia)                                                    | Treatment                        | 1         | 1.80                       | 0.19            |
|                                                                                     | Calf age                         | 3         | 130.24                     | <0.001          |
|                                                                                     | Interaction treatment x calf age | 3         | 0.56                       | 0.64            |
|                                                                                     | Birth weight                     | 1         | 0.009                      | 0.92            |
| <b>GENMOD</b>                                                                       |                                  |           |                            |                 |
| <b>Dependent variable</b>                                                           | <b>Sources of variation</b>      | <b>DF</b> | <b><math>\chi^2</math></b> | <b>P values</b> |
| Weaning success (WS, binomial)                                                      | Treatment                        | 1         | 0.01                       | 0.91            |
| Diarrhea (binomial)                                                                 | Treatment                        | 1         | 0.04                       | 0.83            |
| Death (binomial)                                                                    | Treatment                        | 1         | 0.96                       | 0.32            |
